# Supplementary material for: Steam reforming of methane on a Ru/Al2O3 catalyst promoted with Mn oxides for solar hydrogen production
Source: Royal Society of Chemistry journal article supplement (doi:10.1039/b613708n), 2007-01-01
Supplement: b613708n.pdf [file b613708n.pdf]

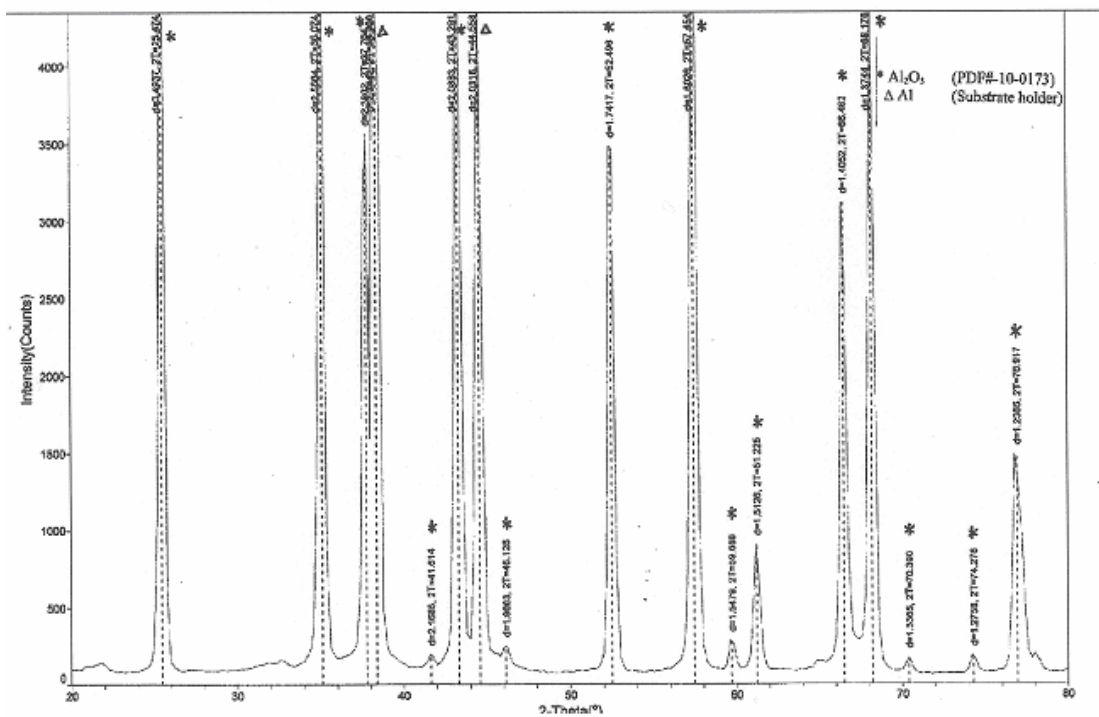

Figure 1 The XRD pattern for alumina powder.

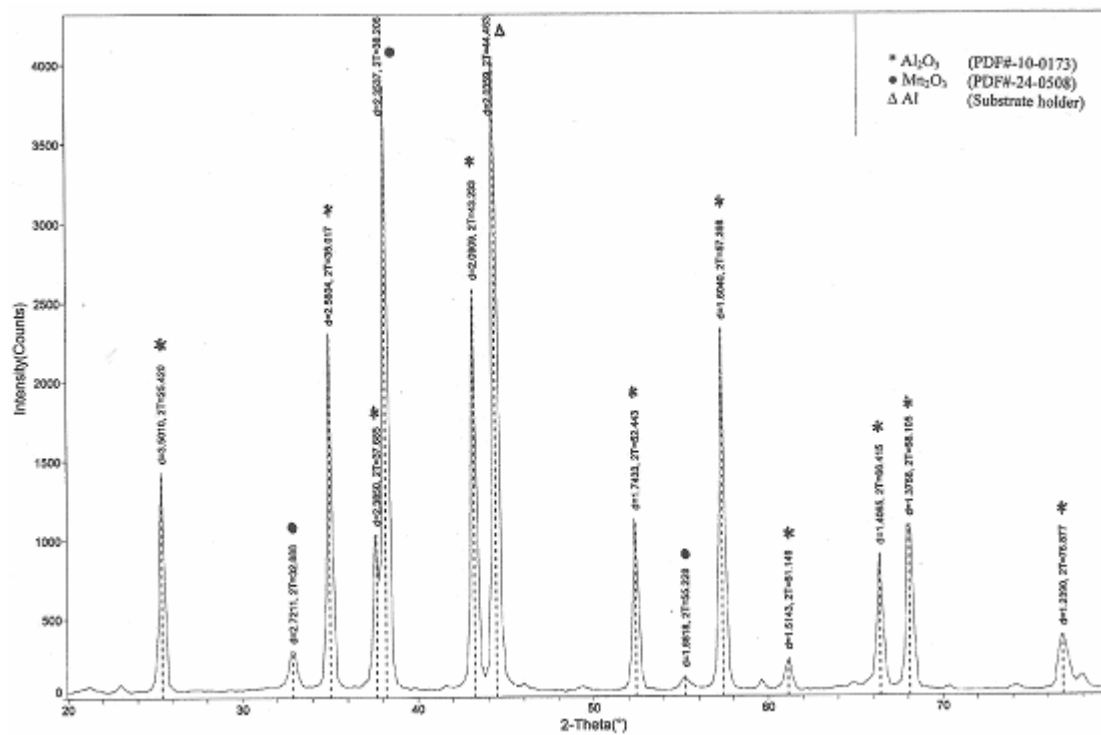

Figure 2. The XRD pattern for the fresh 2% Ru/( $\text{Al}_2\text{O}_3$ +MnOx) catalyst

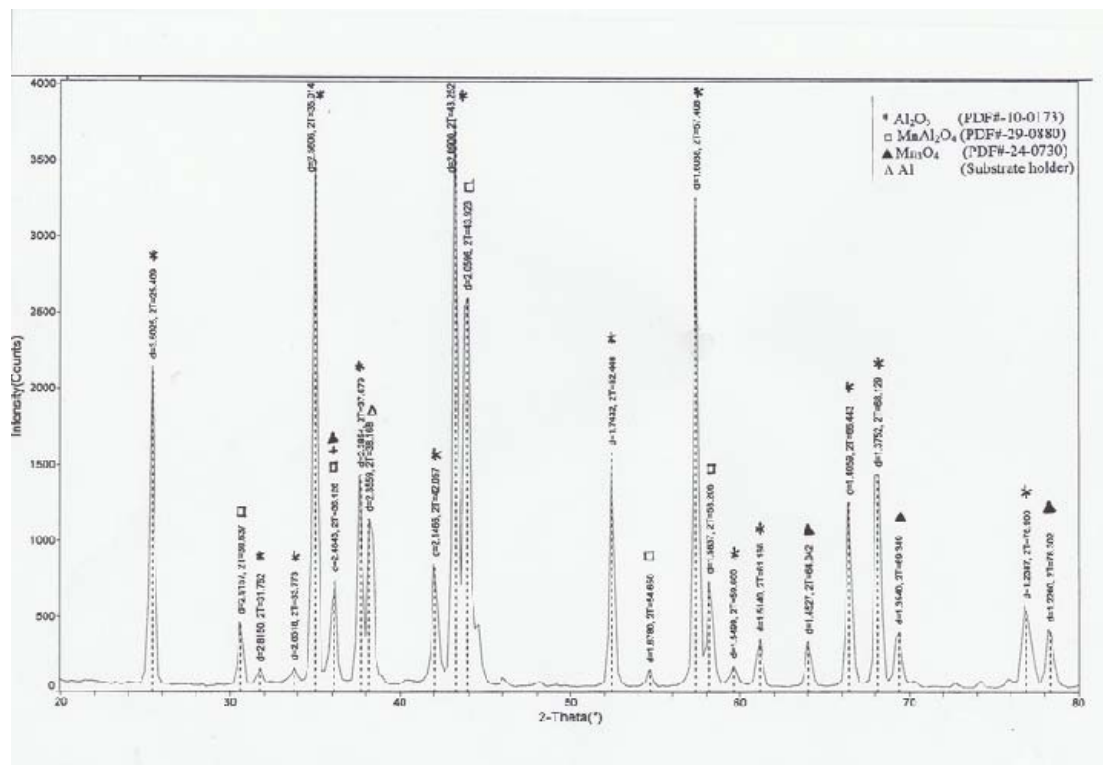

Figure 3. The XRD pattern for the 2% Ru/(Al<sub>2</sub>O<sub>3</sub>+MnO<sub>x</sub>) catalyst after reaction,
